# Supplementary material for: LncRNA-FAM66C Was Identified as a Key Regulator for Modulating Tumor Microenvironment and Hypoxia-Related Pathways in Glioblastoma
Source: Front Public Health. 2022 Jul 6;10:898270. doi: 10.3389/fpubh.2022.898270 (PMC9299378; doi:10.3389/fpubh.2022.898270)
Supplement: Supplementary file 12 [file Table_12.XLSX]

## Sheet: tcga.subtype
Tag	Cluster
TCGA-06-0878-01A	C1
TCGA-26-5135-01A	C3
TCGA-06-5859-01A	C3
TCGA-06-2563-01A	C3
TCGA-41-2571-01A	C3
TCGA-28-5207-01A	C3
TCGA-14-0871-01A	C3
TCGA-16-1045-01B	C1
TCGA-32-2632-01A	C2
TCGA-06-0156-01A	C1
TCGA-06-0141-01A	C1
TCGA-06-2569-01A	C3
TCGA-02-2485-01A	C3
TCGA-06-0138-01A	C1
TCGA-06-2564-01A	C3
TCGA-28-5213-01A	C1
TCGA-76-4928-01B	C2
TCGA-76-4931-01A	C3
TCGA-06-5856-01A	C2
TCGA-19-2620-01A	C2
TCGA-26-5132-01A	C2
TCGA-06-2558-01A	C3
TCGA-06-5414-01A	C2
TCGA-26-5133-01A	C3
TCGA-32-4213-01A	C2
TCGA-06-5417-01A	C3
TCGA-19-2624-01A	C3
TCGA-14-1823-01A	C2
TCGA-02-0055-01A	C1
TCGA-32-1982-01A	C1
TCGA-06-2570-01A	C3
TCGA-06-0745-01A	C3
TCGA-14-0781-01B	C1
TCGA-32-5222-01A	C2
TCGA-28-5204-01A	C3
TCGA-06-5410-01A	C1
TCGA-14-1829-01A	C1
TCGA-02-0047-01A	C3
TCGA-15-0742-01A	C3
TCGA-19-2619-01A	C2
TCGA-06-0168-01A	C2
TCGA-19-1390-01A	C3
TCGA-41-4097-01A	C1
TCGA-06-0649-01B	C1
TCGA-27-2526-01A	C2
TCGA-27-2523-01A	C3
TCGA-06-5412-01A	C1
TCGA-19-4065-01A	C1
TCGA-06-0644-01A	C1
TCGA-12-0821-01A	C3
TCGA-28-1753-01A	C3
TCGA-12-0619-01A	C1
TCGA-14-0789-01A	C1
TCGA-32-2634-01A	C3
TCGA-06-0158-01A	C2
TCGA-12-0618-01A	C3
TCGA-26-5139-01A	C2
TCGA-06-0747-01A	C3
TCGA-32-2616-01A	C2
TCGA-06-0129-01A	C3
TCGA-76-4929-01A	C3
TCGA-06-0157-01A	C3
TCGA-28-5220-01A	C3
TCGA-12-5295-01A	C2
TCGA-06-0645-01A	C1
TCGA-26-5134-01A	C3
TCGA-32-2615-01A	C2
TCGA-32-1980-01A	C2
TCGA-26-1442-01A	C3
TCGA-06-0187-01A	C2
TCGA-14-0790-01B	C3
TCGA-14-2554-01A	C3
TCGA-27-1834-01A	C3
TCGA-28-2514-01A	C2
TCGA-14-1825-01A	C3
TCGA-12-1597-01B	C3
TCGA-41-3915-01A	C1
TCGA-06-2561-01A	C2
TCGA-19-1787-01B	C2
TCGA-27-1830-01A	C1
TCGA-06-0125-01A	C2
TCGA-28-1747-01C	C3
TCGA-41-2572-01A	C2
TCGA-06-2567-01A	C2
TCGA-06-0211-01A	C1
TCGA-27-2528-01A	C2
TCGA-06-0184-01A	C2
TCGA-06-0744-01A	C3
TCGA-14-0787-01A	C2
TCGA-06-2565-01A	C2
TCGA-06-0178-01A	C3
TCGA-06-2557-01A	C3
TCGA-76-4927-01A	C2
TCGA-06-5858-01A	C2
TCGA-12-3653-01A	C3
TCGA-28-2513-01A	C1
TCGA-12-3652-01A	C2
TCGA-27-2524-01A	C1
TCGA-14-0817-01A	C1
TCGA-06-1804-01A	C2
TCGA-26-5136-01B	C2
TCGA-06-0646-01A	C1
TCGA-28-5218-01A	C1
TCGA-02-2483-01A	C3
TCGA-06-2562-01A	C1
TCGA-27-1837-01A	C3
TCGA-06-2559-01A	C1
TCGA-06-0686-01A	C3
TCGA-06-5416-01A	C3
TCGA-06-0238-01A	C3
TCGA-14-1034-01A	C2
TCGA-19-2629-01A	C3
TCGA-19-2625-01A	C2
TCGA-06-0130-01A	C1
TCGA-12-5299-01A	C2
TCGA-06-0882-01A	C3
TCGA-06-5413-01A	C3
TCGA-76-4925-01A	C2
TCGA-06-5418-01A	C1
TCGA-06-0190-01A	C1
TCGA-27-1835-01A	C2
TCGA-28-5216-01A	C2
TCGA-06-5411-01A	C3
TCGA-27-2519-01A	C2
TCGA-16-0846-01A	C3
TCGA-28-5209-01A	C2
TCGA-76-4926-01B	C2
TCGA-06-0219-01A	C1
TCGA-02-2486-01A	C1
TCGA-06-0750-01A	C1
TCGA-15-1444-01A	C3
TCGA-27-1832-01A	C2
TCGA-28-2499-01A	C2
TCGA-06-0174-01A	C3
TCGA-12-0616-01A	C3
TCGA-32-1970-01A	C3
TCGA-28-5215-01A	C3
TCGA-06-0132-01A	C2
TCGA-06-5408-01A	C2
TCGA-28-5208-01A	C2
TCGA-28-2509-01A	C2
TCGA-19-5960-01A	C3
TCGA-41-5651-01A	C3
TCGA-27-2521-01A	C3
TCGA-12-3650-01A	C3
TCGA-06-0743-01A	C2
TCGA-76-4932-01A	C2
TCGA-08-0386-01A	C2
TCGA-06-0749-01A	C3
TCGA-27-1831-01A	C1
TCGA-32-2638-01A	C1
